# Supplementary material
Source: MDPI journal article supplement (https://www.mdpi.com/2073-4344/8/2/52)
Supplement: s1 [file s1]

Supplementary Materials: Relations between Structure, Activity and Stability in C3N4 based Photocatalysts used for Solar Hydrogen Production

Ramesh P. Sivasankaran 1, Nils Rockstroh 1, Dirk Hollmann 1, Carsten R. Kreyenschulte 1,
Giovanni Agostini 1, Henrik Lund 1, Amitava Acharjya 2, Jabor Rabeah 1, Ursula Bentrup 1, Henrik Junge 1, Arne Thomas 2 and Angelika Brückner 1,*

**Table S1.** Surface area, reaction conditions and H2 evolution rates of selected C3N4-based photocatalysts.

| No. | Catalyst | SBET  (m2/g) | Co- catalyst /wt.% | Sacrificial agent | Light source | Incident light (nm) | Activity  (μmol g−1 h−1 ) | Time (h) | Reference |
| --- | --- | --- | --- | --- | --- | --- | --- | --- | --- |
| 1 | SG-C3N4 | 1 | Pt/0.8 | TEOA | 300 W Xe | >395 | 143 | 24 | [1] |
| 2 | SG-C3N4 | 131 | Pt/0.8 | TEOA | 300 W Xe | > 395 | 1379 | 24 | [1] |
| 3 | g-C3N4 | 142 | Ni/0.73 | TEOA | 300 W Xe | > 420 | 103 | 48 | [2] |
| 4 | g-C3N4 | - | Cu/3.0 | Methanol | 300 W Xe | > 400 | 20 | 6 | [3] |
| 5 | Ag2S/g-C3N4 | 13 | - | Methanol | 3 W UV-LED | > 420 | 200 | 4 | [4] |
| 6 | MoS2/g-C3N4 | - | Pt/1.0 | Methanol | 300 W Xe | > 420 | 231 | 6 | [5] |
| 7 | WS2/g-C3N4 | - | - | Lactic acid | 300 W Xe | > 420 | 240 | - | [6] |
| 8 | CdS/g-C3N4 | 23 | Pt/0.6 | Na2S/ Na2SO3 | 350 W Xe | > 420 | 4152 | - | [7] |
| 9 | CuInS2/  g-C3N4 | 96 | Pt/1.0 | Na2S/ Na2SO3 | 300 W Xe | > 420 | 1290 | 5 | [8] |
| 10 | ZnIn2S4/  g-C3N4 | 66 | - | TEOA | 300 W Xe | > 400 | 2820 | 2 | [9] |
| 11 | CaIn2S4/  g-C3N4 | 54 | Pt/1.0 | Na2S/ Na2SO3 | 12 W UV-LED | - | 102 | - | [10] |
| 12 | CoO/g-C3N4 | 111 | Pt/1.0 | TEOA | 300 W Xe | > 400 | 651.3 | 1 | [11] |
| 13 | Cu2O/g-C3N4 | - | Pt/1.0 | TEOA | 300 W Xe | > 420 | 241 | 11 | [12] |
| 14 | In2O3/g-C3N4 | - | Pt/0.5 | Ascorbic acid | 300 W Xe | > 420 | 198.0 | 4 | [13] |
| 15 | AgIn5S8/  C3N4 | 118 | Pt/≤ 2.0 | TEOA | 300 W Xe | > 420 | ≤ 1395 | 24 | This work |

**Table S2.** Reaction conditions and H2 evolution rates of AgIn5S8 photocatalysts.

| No. | | Catalyst  (Mass) | Co-catalyst /wt% | Sacrificial agent | Light source | Incident light | Activity  (μmol g−1 h−1 ) | Time (h) | Reference |
| --- | --- | --- | --- | --- | --- | --- | --- | --- | --- |
| 1 | AgIn5S8  (100 mg) | | Pt/2.0 | Na2S/ Na2SO3 | 300 W Xe | > 420 nm | 1001 | 3 h | [14] |
| 2 | AgIn5S8  (100 mg) | | Pt/2.0 | Na2S/ Na2SO3 | 300 W Xe | > 420 nm | 110 | - | [15] |
| 3 | AgIn5S8  (200 mg) | | Pt/0.5 | Na2S/ K2SO3 | 300 W Xe | > 420 nm | 1150 | 7 h | [16] |

**Figure S1.** UV-vis diffuse reflectance spectra of AIS, CN and AIS-CN composites with different contents of AIS (**a**) and band gap estimation from Tauc equation (**b**).

**Figure S2.** XRD powder patterns of (**a**) as-prepared samples and (**b**) Pt/CN and Pt/10AIS-CN samples removed from the reactor after 3 h and 20 h irradiation with UV-vis light in the presence of TEOA.

**Figure S3.** ATR-IR spectra of (**a**) as-prepared samples and (**b**) Pt/CN and Pt/10AIS-CN samples removed from the reactor after 3 and 20 h irradiation with UV-vis light in the presence of TEOA.

**Figure S4.** (**a**) N2 adsorption-desorption isotherms of AIS, CN and 10AIS-CN; (**b**) Barrett-Joyner-Halenda pore size distribution plot. N2 adsorption-desorption revealed type IV isotherms for both CN and 10AIS-CN, indicating the presence of slit-shaped mesopores (2–50 nm). In contrast, AIS is a nonporous powder. The pore size distributions of the samples were estimated by the Barrett-Joyner-Halenda (BJH) method from the desorption branches (plot b).


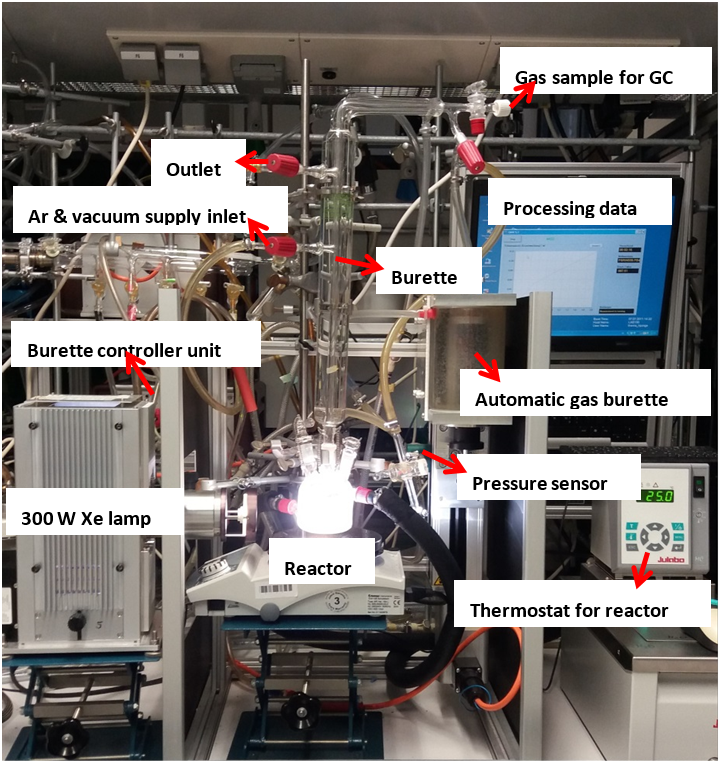


**Figure S5.** Experimental setup.

References

1. Kailasam, K.; Epping, J.D.; Thomas, A.; Losse, S.; Junge, H. Mesoporous carbon nitride-silica composites by a combined sol-gel/thermal condensation approach and their application as photocatalysts. *Energy Environ. Sci.* **2011**, *4*, 4668*–*4674.

2. Indra, A.; Menezes, P.W.; Kailasam, K.; Hollmann, D.; Schroder, M.; Thomas, A.; Bruckner, A.; Driess, M. Nickel as a co-catalyst for photocatalytic hydrogen evolution on graphitic-carbon nitride (sg-CN): What is the nature of the active species? *Chem. Commun.* **2016**, *52*, 104*–*107.

3. Fan, M.; Song, C.; Chen, T.; Yan, X.; Xu, D.; Gu, W.; Shi, W.; Xiao, L. Visible-light-drived high photocatalytic activities of Cu/g-C3N4 photocatalysts for hydrogen production. *RSC Adv.* **2016**, *6*, 34633*–*34640.

4. Jiang, D.; Chen, L.; Xie, J.; Chen, M. Ag2S/g-C3N4 composite photocatalysts for efficient Pt-free hydrogen production. The co-catalyst function of Ag/Ag2S formed by simultaneous photodeposition. *Dalton Trans.***2014**, *43*, 4878*–*4885.

5. Ge, L.; Han, C.; Xiao, X.; Guo, L. Synthesis and characterization of composite visible light active photocatalysts MoS2-g-C3N4 with enhanced hydrogen evolution activity. *Int. J. Hydrog. Energy.* **2013**, *38*, 6960*–*6969.

6. Hou, Y.; Zhu, Y.; Xu, Y.; Wang, X. Photocatalytic hydrogen production over carbon nitride loaded with WS2 as cocatalyst under visible light. *Appl. Catal. B Environ.* **2014,** *156***–***157*, 122*–*127.

7. Zhang, J.; Wang, Y.; Jin, J.; Zhang, J.; Lin, Z.; Huang, F.; Yu, J. Efficient visible-light photocatalytic hydrogen evolution and enhanced photostability of core/shell CdS/g-C3N4 nanowires. *ACS Appl. Mater. Interfaces.* **2013**, *5*, 10317*–*10324.

8. Li, X.; Xie, K.; Song, L.; Zhao, M.; Zhang, Z. Enhanced Photocarrier Separation in Hierarchical Graphitic-C3N4-Supported CuInS2 for Noble-Metal-Free Z-Scheme Photocatalytic Water Splitting. *ACS Appl. Mater. Interfaces.* **2017**, *9*, 24577*–*24583.

9. Zhang, Z.; Liu, K.; Feng, Z.; Bao, Y.; Dong, B. Hierarchical Sheet-on-Sheet ZnIn2S4/g-C3N4 Heterostructure with Highly Efficient Photocatalytic H2 production Based on Photoinduced Interfacial Charge Transfer. *Sci. Rep.* **2016**, *6*, 19221*–*19231.

10. Jiang, D.; Li, J.; Xing, C.; Zhang, Z.; Meng, S.; Chen, M. Two-Dimensional CaIn2S4/g-C3N4 Heterojunction Nanocomposite with Enhanced Visible-Light Photocatalytic Activities: Interfacial Engineering and Mechanism Insight. *ACS Appl. Mater. Interfaces.* **2015**, *7*, 19234*–*19242.

11. Mao, Z.; Chen, J.; Yang, Y.; Wang, D.; Bie, L.; Fahlman, B.D. Novel g-C3N4/CoO Nanocomposites with Significantly Enhanced Visible-Light Photocatalytic Activity for H2 Evolution. *ACS Appl. Mater. Interfaces.* **2017**, *9*, 12427*–*12435.

12. Chen, J.; Shen, S.; Guo, P.; Wang, M.; Wu, P.; Wang, X.; Guo, L. In-situ reduction synthesis of nano-sized Cu2O particles modifying g-C3N4 for enhanced photocatalytic hydrogen production. *Appl. Catal. B Environ.* **2014,** *152***–***153*, 335*–*341.

13. Cao, S.-W.; Liu, X.-F.; Yuan, Y.-P.; Zhang, Z.-Y.; Liao, Y.-S.; Fang, J.; Loo, S.C.J.; Sum, T.C.; Xue, C. Solar-to-fuels conversion over In2O3/g-C3N4 hybrid photocatalysts. *Appl. Catal. B Environ.* **2014**, *147*, 940*–*946.

14. Li, K.; Xu, J.; Zhang, X.; Peng, T.; Li, X. Low-temperature preparation of AgIn5S8/TiO2 heterojunction nanocomposite with efficient visible-light-driven hydrogen production. *Int. J. Hydrog. Energy.* **2013**, *38*, 15965*–*15975.

15. Li, K.; Chai, B.; Peng, T.; Mao, J.; Zan, L. Preparation of AgIn5S8/TiO2 Heterojunction Nanocomposite and Its Enhanced Photocatalytic H2 Production Property under Visible Light. *ACS Catal.* **2013**, *3*, 170*–*177.

16. Chen, D.; Ye, J. Photocatalytic H2 evolution under visible light irradiation on AgIn5S8 photocatalyst. *J. Phys. Chem. Solids.* **2007**, *68*, 2317*–*2320.

© 2017 by the authors. Submitted for possible open access publication under the
terms and conditions of the Creative Commons Attribution (CC BY) license (http://creativecommons.org/licenses/by/4.0/).
